# Supplementary material
Source: PubMed Central journal article supplement (PMC6594383)

**Prognostic Value of Albuminuria and Influence of  
Spironolactone in Heart Failure with Preserved  
Ejection Fraction: The TOPCAT Trial**

Supplemental Material

S. Selvaraj et al.

## Supplementary Figure Legend

### Supplementary Figure 1:

**Title:** *Treatment Effect of Spironolactone by Baseline Urinary Albumin to Creatinine Ratio for the Primary Outcome*

**Caption:** Interaction spline for the treatment effect (hazard ratio) of spironolactone is shown by baseline urinary albumin to creatinine ratio (mg/g) for the primary outcome of cardiovascular death, aborted cardiac arrest, or heart failure hospitalization.

Spironolactone demonstrated a consistent effect across baseline urinary albumin to creatinine ratio ( $p=1.00$ ).

### Supplementary Figure 2:

**Title:** *Relationship between Change in Systolic Blood Pressure and Change in Albuminuria*

**Caption:** A linear relationship is demonstrated between change in systolic blood pressure and ratio of albuminuria between the 1-year and baseline visits, adjusted for baseline systolic blood pressure and baseline urinary albumin to creatinine ratio. P-value shown for linear trend.

**Table S1. Characteristics of Participants with and without Baseline Albuminuria Measurements**

|                                                      | <b>Missing Baseline<br/>UACR<br/>Measurements<br/>N=590</b> | <b>Available Baseline<br/>UACR<br/>Measurements<br/>N=1175</b> | <b>P-value*</b> |
|------------------------------------------------------|-------------------------------------------------------------|----------------------------------------------------------------|-----------------|
| Randomization to spironolactone, n (%)               | 288 (48.8%)                                                 | 597 (50.8%)                                                    | 0.43            |
| Age, years                                           | 71 ± 10                                                     | 72 ± 10                                                        | 0.06            |
| Female, n (%)                                        | 318 (53.9%)                                                 | 562 (47.8%)                                                    | 0.016           |
| White race, n (%)                                    | 447 (75.8%)                                                 | 936 (79.7%)                                                    | 0.06            |
| NYHA Class III or IV, n (%)                          | 221 (37.6%)                                                 | 398 (33.9%)                                                    | 0.12            |
| Enrollment through HF hospitalization stratum, n (%) | 307 (52.0%)                                                 | 668 (56.9%)                                                    | 0.05            |
| <b>Physical Characteristics</b>                      |                                                             |                                                                |                 |
| Systolic blood pressure, mmHg                        | 128 ± 15                                                    | 127 ± 16                                                       | 0.72            |
| Diastolic blood pressure, mmHg                       | 71 ± 11                                                     | 72 ± 12                                                        | 0.2             |
| Heart rate (beats/min)                               | 69 ± 11                                                     | 69 ± 11                                                        | 0.63            |
| Body mass index (kg/m <sup>2</sup> )                 | 34.2 ± 9.1                                                  | 33.7 ± 8.1                                                     | 0.26            |
| <b>Comorbidities, n (%)</b>                          |                                                             |                                                                |                 |
| Hypertension                                         | 539 (91.7%)                                                 | 1047 (89.1%)                                                   | 0.09            |
| Atrial fibrillation                                  | 198 (33.7%)                                                 | 544 (46.3%)                                                    | 0.001           |
| Diabetes mellitus                                    | 272 (46.3%)                                                 | 515 (43.8%)                                                    | 0.33            |
| Myocardial Infarction                                | 124 (21.1%)                                                 | 235 (20.0%)                                                    | 0.59            |
| COPD                                                 | 101 (17.2%)                                                 | 190 (16.2%)                                                    | 0.59            |
| Stroke                                               | 48 (8.2%)                                                   | 110 (9.4%)                                                     | 0.41            |
| Peripheral artery disease                            | 79 (13.4%)                                                  | 128 (10.9%)                                                    | 0.12            |
| Chronic kidney disease                               | 296 (50.2%)                                                 | 558 (47.5%)                                                    | 0.29            |
| Current smoker                                       | 43 (7.3%)                                                   | 73 (6.2%)                                                      | 0.39            |
| <b>Medication Use, n (%)</b>                         |                                                             |                                                                |                 |
| ACE-I and/or ARB                                     | 457 (77.6%)                                                 | 936 (79.9%)                                                    | 0.30            |
| Beta-blocker                                         | 478 (81.2%)                                                 | 907 (77.3%)                                                    | 0.06            |
| Calcium channel blocker                              | 220 (37.4%)                                                 | 461 (39.3%)                                                    | 0.44            |
| Diuretic                                             | 520 (88.3%)                                                 | 1051 (89.5%)                                                   | 0.43            |

|                                                                    |             |             |       |
|--------------------------------------------------------------------|-------------|-------------|-------|
| Other anti-hypertensive medication                                 | 96 (16.3%)  | 198 (16.9%) | 0.76  |
| Statin                                                             | 390 (66.2%) | 758 (64.5%) | 0.47  |
| <b>Laboratory Testing</b>                                          |             |             |       |
| Estimated glomerular filtration rate (mL/min/1.78 m <sup>2</sup> ) | 63 ± 22     | 65 ± 21     | 0.18  |
| Hemoglobin (mg/dL)                                                 | 12.7 ± 1.7  | 12.9 ± 1.7  | 0.004 |
| <b>Electrocardiographic and Imaging Data</b>                       |             |             |       |
| Ejection fraction (%)                                              | 58 ± 8      | 58 ± 7      | 0.30  |
| ECG Left ventricular hypertrophy (%)                               | 53 (12.4%)  | 114 (12.7%) | 0.91  |

UACR, urine albumin to creatinine ratio; NYHA, New York Heart Association; COPD, chronic obstructive pulmonary disease; ACE-I, angiotensin-converting-enzyme inhibitor; ARB, angiotensin II receptor blocker; HF, heart failure.

\*P-value shown for trend.

**Table S2. Crude and Adjusted Hazard Ratios for Efficacy and Safety Outcomes by Continuous Urinary Albumin to Creatinine Ratio**

| <b>Outcomes, n (%)</b>         | <b>Hazard Ratio per Doubling of UACR (95% CI), P-value</b> | <b>Baseline Albuminuria x treatment interaction P-value</b> |
|--------------------------------|------------------------------------------------------------|-------------------------------------------------------------|
| Composite endpoint             |                                                            | 1.00                                                        |
| • Crude model                  | 1.11 (1.07, 1.16), p<0.001                                 |                                                             |
| • Multivariable adjusted model | 1.08 (1.04, 1.13), p<0.001                                 |                                                             |
| Cardiovascular mortality       |                                                            | 0.68                                                        |
| • Crude model                  | 1.07 (1.01, 1.13), p=0.019                                 |                                                             |
| • Multivariable adjusted model | 1.06 (1.00, 1.12), p=0.068                                 |                                                             |
| HF hospitalization             |                                                            | 0.91                                                        |
| • Crude model                  | 1.14 (1.10, 1.20), p<0.001                                 |                                                             |
| • Multivariable adjusted model | 1.11 (1.06, 1.16), p<0.001                                 |                                                             |
| All cause mortality            |                                                            | 0.90                                                        |
| • Crude model                  | 1.05 (1.01, 1.110), p=0.023                                |                                                             |
| • Multivariable adjusted model | 1.05 (1.00, 1.10), p=0.041                                 |                                                             |
| Doubling of creatinine         |                                                            | 0.54                                                        |
| • Crude model                  | 1.06 (1.00, 1.12), p=0.043                                 |                                                             |
| • Multivariable adjusted model | 1.04 (0.98, 1.10), p=0.19                                  |                                                             |
| Hyperkalemia                   |                                                            | 0.29                                                        |
| • Crude model                  | 1.11 (1.05, 1.16), p<0.001                                 |                                                             |
| • Multivariable adjusted model | 1.10 (1.04, 1.16), p=0.001                                 |                                                             |
| Study drug discontinuation     |                                                            | 0.22                                                        |
| • Crude model                  | 1.04 (1.00, 1.07), p=0.32                                  |                                                             |
| • Multivariable adjusted model | 1.02 (0.99, 1.06), p=0.23                                  |                                                             |

CI, confidence interval; UACR, urinary albumin to creatinine ratio; HF, heart failure

**Table S3. Ratio of Urinary Albumin to Creatinine Ratio at the 1-Year Visit vs. Baseline by Treatment Arm in Subgroup Analysis**

|                           | <b>Treatment Effect of Spironolactone vs. Placebo</b>                                          |                                                                                         |
|---------------------------|------------------------------------------------------------------------------------------------|-----------------------------------------------------------------------------------------|
|                           | <b>Geometric Mean Ratio of 1-Year to Baseline UACR in Spironolactone Arm (95% CI), P-value</b> | <b>Geometric Mean Ratio of 1-Year to Baseline UACR in Placebo Arm (95% CI), P-value</b> |
| <b>All Patients</b>       | 0.71 (0.58, 0.88), p=0.001                                                                     | 0.97 (0.83, 1.18), p=0.88                                                               |
| <b>Albuminuria Status</b> |                                                                                                |                                                                                         |
| Normalalbuminuria         | 1.39 (1.09, 1.77), p=0.008                                                                     | 1.97 (1.55, 2.51), p<0.001                                                              |
| Microalbuminuria          | 0.50 (0.38, 0.66), p<0.001                                                                     | 0.63 (0.49, 0.79), p<0.001                                                              |
| Macroalbuminuria          | 0.06 (0.02, 0.12), p<0.001                                                                     | 0.24 (0.14, 0.41), p<0.001                                                              |

**Table S4. Baseline Clinical and Laboratory Characteristics and Association with Change in Urinary Albumin to Creatinine Ratio at the 1-Year Visit after Multivariable Adjustment**

|                                               | <b>Percent Change</b> | <b>95% Confidence Interval</b> | <b> Z </b> | <b>P-value</b> |
|-----------------------------------------------|-----------------------|--------------------------------|------------|----------------|
| <b>Baseline UACR (per doubling)</b>           | +31%                  | +25%, +37%                     | 11.82      | <0.001         |
| <b>eGFR (per 10 ml/min/1.73m<sup>2</sup>)</b> | -9%                   | -14, -4%                       | 3.19       | 0.001          |
| <b>Diabetes mellitus</b>                      | +32%                  | +3%, +70%                      | 2.21       | 0.028          |
| <b>Systolic blood pressure (per 10 mmHg)</b>  | +8%                   | -0%, +17%                      | 1.84       | 0.07           |
| <b>Age (per year)</b>                         | -1%                   | -3%, 0%                        | 1.71       | 0.09           |
| <b>Female gender</b>                          | -13%                  | -32%, +10%                     | 1.19       | 0.24           |
| <b>Current smoker</b>                         | +33%                  | -28%, +127%                    | 1.03       | 0.30           |
| <b>Heart rate (per 10 beats per minute)</b>   | +5%                   | -5%, +17%                      | 0.93       | 0.35           |
| <b>White race</b>                             | +10%                  | -20%, +50%                     | 0.57       | 0.57           |
| <b>NYHA class III or IV</b>                   | +6%                   | -17%, +37%                     | 0.48       | 0.63           |
| <b>ACE-I or ARB use</b>                       | +1%                   | -25%, +36%                     | 0.08       | 0.93           |

UACR, urinary albumin to creatinine ratio; ACE-I, angiotensin-converting-enzyme inhibitor; ARB, angiotensin II receptor blocker; eGFR, estimated glomerular filtration rate

Supplementary Figure 1.

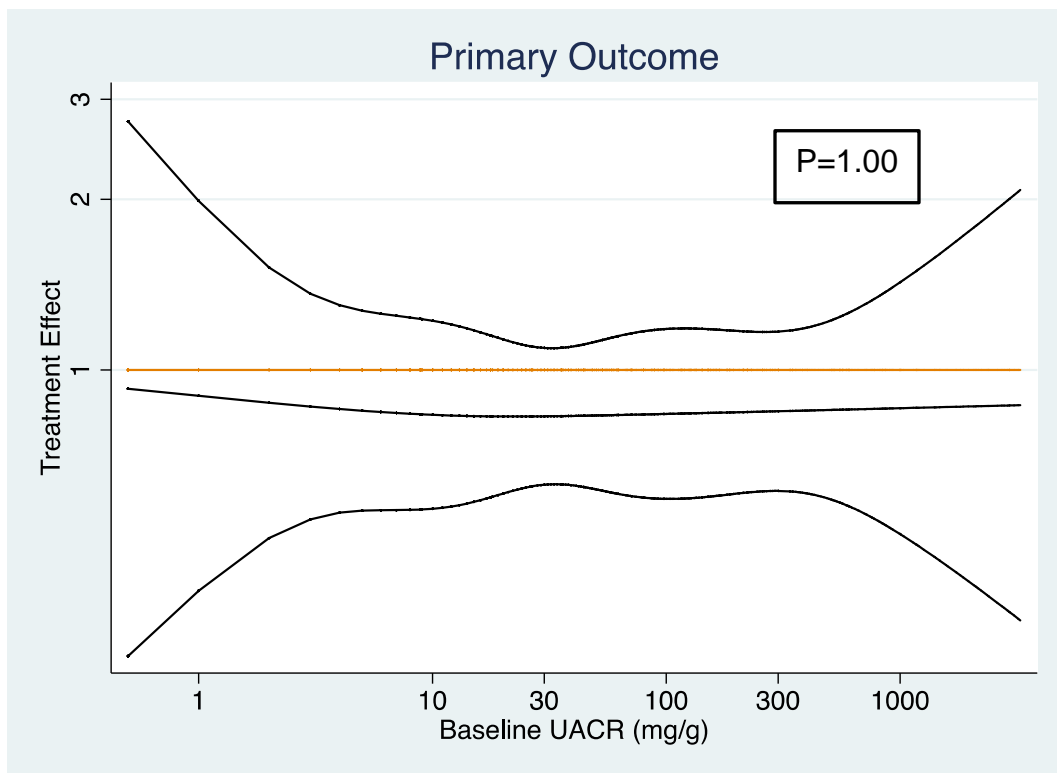



Supplementary Figure 2.

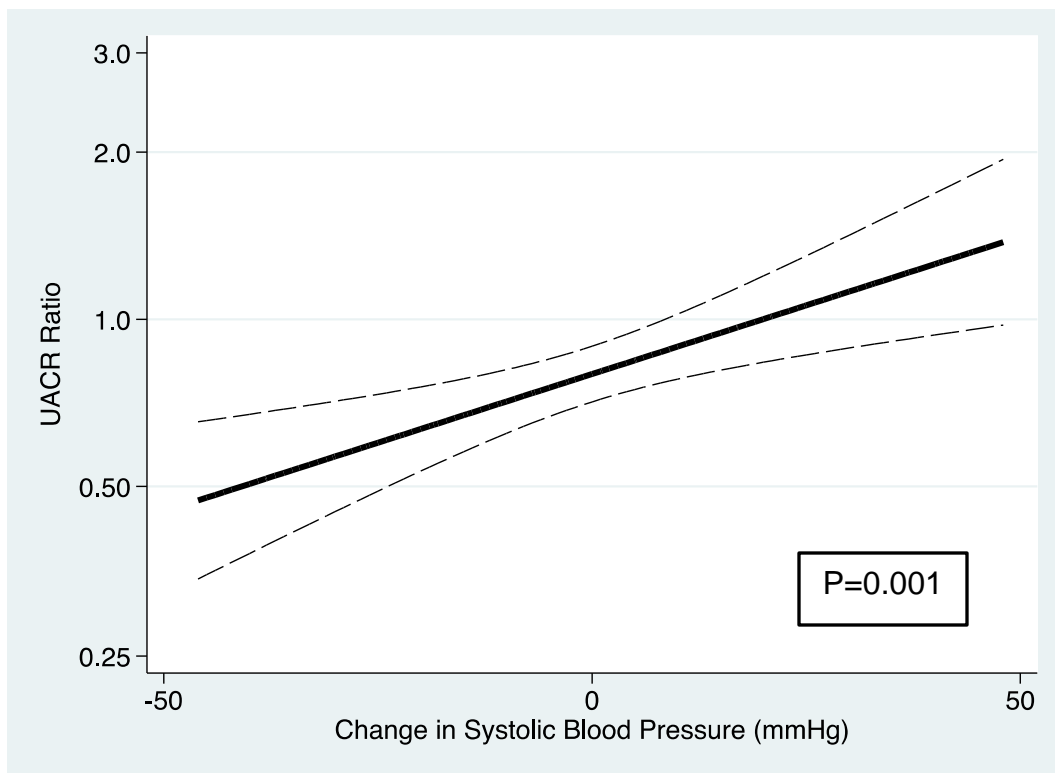

Supplement: NIHMS1509778-supplement-Supplemental_Material.pdf [file NIHMS1509778-supplement-Supplemental_Material.pdf]
